# Supplementary material
Source: PubMed Central journal article supplement (PMC7982928)

**Supplementary material****Supplementary Figure 1.** Flow chart of patient recruitment, attrition and response in the study.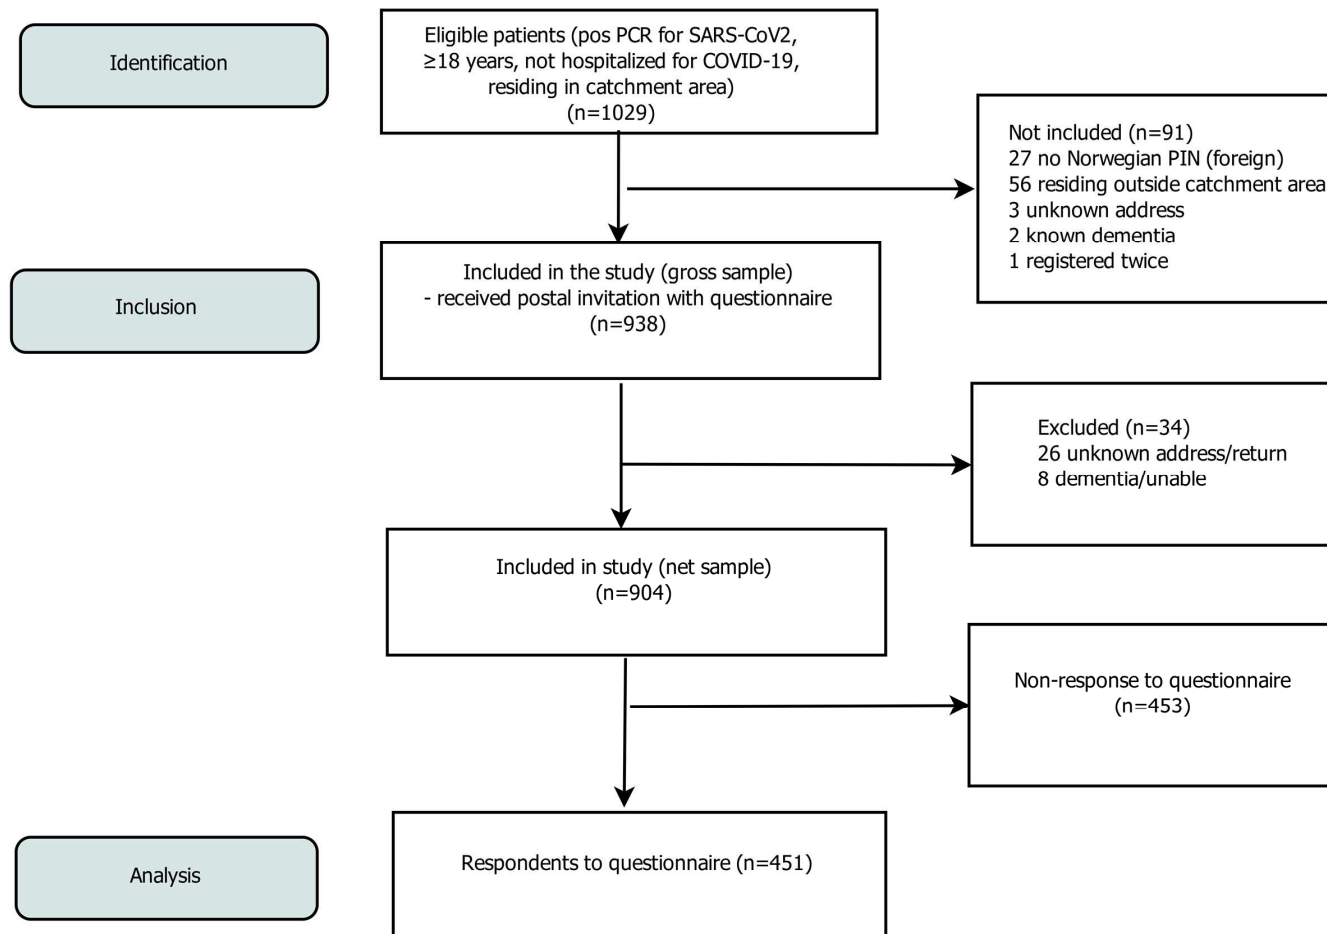

**Supplementary Figure 2.** Distribution of symptom scores (number of 23 symptoms) during COVID-19 and 1.5–6 months later.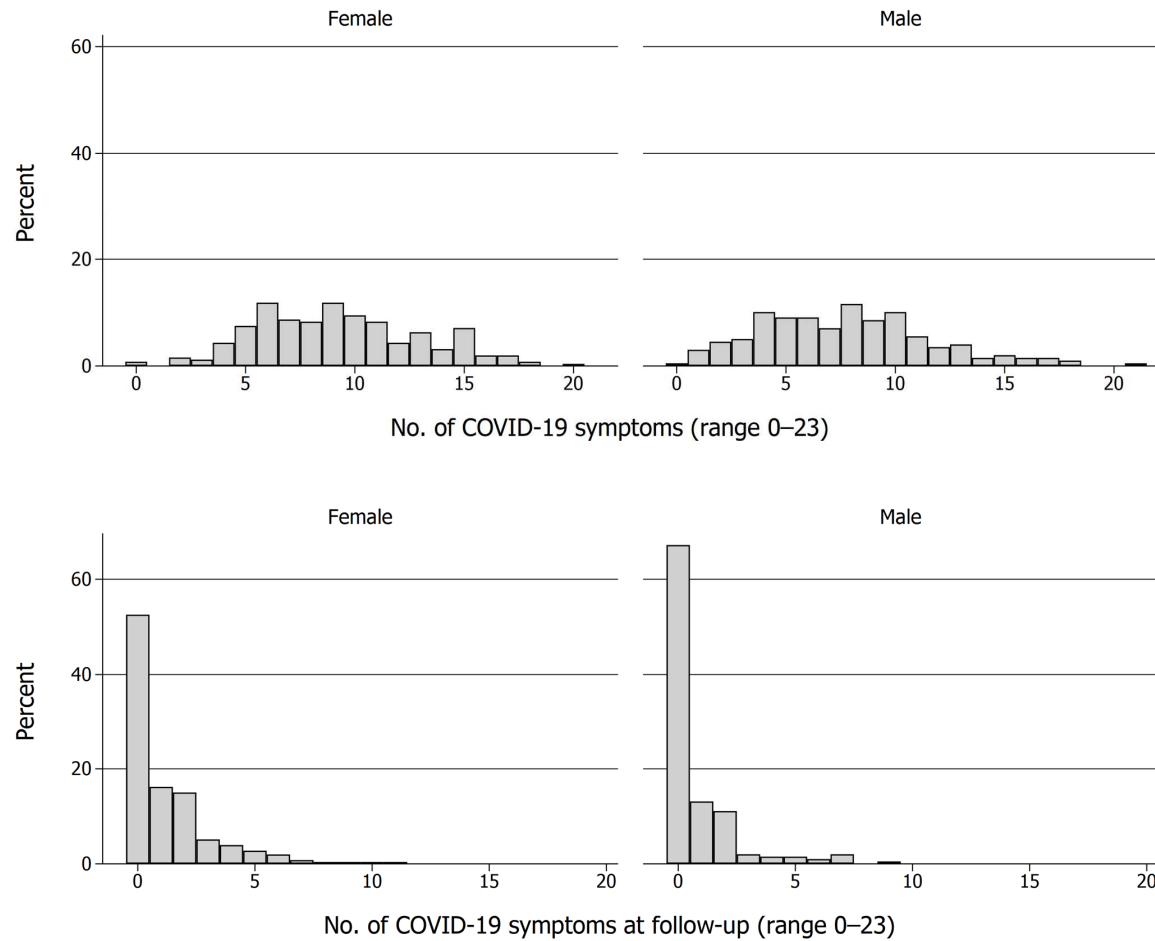

Supplement: thoraxjnl-2020-216377supp001.pdf [file thoraxjnl-2020-216377supp001.pdf]
